# Supplementary material
Source: Frontiers journal article supplement (https://www.frontiersin.org/articles/472262)
Supplement: Table_1.XLS [file Table_1.XLS]

## Sheet: full
Supplementary Table 1. 40Ar/39Ar total fusion data and analytical conditions
Run_ID	Sample	Pumice	Lab ID	Locality	Irrad	Fit_Type	Age [Ma]	Age_Er [Ma]	Age_Er_with J [Ma]		Age_Monte_Carlo	Ar39_Moles	Ar40_Moles	J	J_Er	Ar40_	Ar40_Er	Ar39_	Ar39_Er	Ar38_	Ar38_Er	Ar37_	Ar37_Er	Ar36_	Ar36_Er	Ar40_BslnCorOnly	Ar40_Er_BslnCorOnly	Ar39_BslnCorOnly	Ar39_Er_BslnCorOnly	Ar38_BslnCorOnly	Ar38_Er_BslnCorOnly	Ar37_BslnCorOnly	Ar37_Er_BslnCorOnly	Ar36_BslnCorOnly	Ar36_Er_BslnCorOnly	Ar40_Disc	Ar40_DiscEr	Ar39_Disc	Ar39_DiscEr	Ar38_Disc	Ar38_DiscEr	Ar37_Disc	Ar37_DiscEr	Ar36_Disc	Ar36_DiscEr	Ar40/Ar36_	Ar40/Ar36_Er	Ar40/Ar38_	Ar40/Ar38_Er
18908-01B	Orange Tuff	p1	OT 130-p1	Turkana	USGS62B	LLLLLA A	1.75143	0.0110725	0.0119986		0.011952	1.42e-15	1.25e-14	0.0001199	3.17e-07	0.556306	0.00062	0.0634425	0.0001134	0.0008834	1.41e-05	0.0003349	1.25e-05	0.0001658	8.72e-06	0.545807	0.00059	0.060865	0.00011	0.0008901	1.2e-05	0.0003437	1.1e-05	0.0002977	7.7e-06	1.01477	0.0021223	1.01477	0.0021223	1.01477	0.0021223	1.01477	0.0021223	1.01477	0.0021223	1926	490	0	0
18908-02B	Orange Tuff	p1	OT 130-p1	Turkana	USGS62B	LLLLLA A	1.7561	0.0147181	0.0154306		0.0154331	1.4e-15	1.49e-14	0.0001199	3.17e-07	0.66555	0.0007948	0.0622927	0.0001232	0.0009136	1.85e-05	0.00042	1.25e-05	0.0005582	1.05e-05	0.648671	0.00077	0.059765	0.00012	0.0009194	1.7e-05	0.0004275	1.1e-05	0.0006939	9.3e-06	1.01477	0.0021223	1.01477	0.0021223	1.01477	0.0021223	1.01477	0.0021223	1.01477	0.0021223	957.5	89	0	0
18908-03B	Orange Tuff	p1	OT 130-p1	Turkana	USGS62B	LLLLLA A	1.77798	0.0187286	0.0193075		0.0191997	1.65e-15	2.14e-14	0.0001199	3.17e-07	0.953203	0.0008658	0.073711	0.0001427	0.0011432	1.85e-05	0.0003953	1.11e-05	0.0011907	1.48e-05	0.921151	0.00084	0.070693	0.00014	0.0011424	1.7e-05	0.0004032	9.4e-06	0.0013336	1.4e-05	1.01477	0.0021223	1.01477	0.0021223	1.01477	0.0021223	1.01477	0.0021223	1.01477	0.0021223	705.1	36	0	0
18909-01B	Orange Tuff	p2	OT 130-p2	Turkana	USGS62B	LLLLLA A	1.84211	0.0792094	0.0793584		0.0789586	3.24e-16	1.14e-14	0.0001199	3.17e-07	0.50756	0.0006405	0.0144605	5.71e-05	0.0004149	1.67e-05	0.0010924	2.28e-05	0.0012947	1.27e-05	0.502353	0.00059	0.0139894	5e-05	0.0004351	1.5e-05	0.0010902	2.2e-05	0.0014415	1.2e-05	1.01477	0.0021223	1.01477	0.0021223	1.01477	0.0021223	1.01477	0.0021223	1.01477	0.0021223	372.4	14	0	0
18909-02B	Orange Tuff	p2	OT 130-p2	Turkana	USGS62B	LLLLLA A	1.82803	0.0673244	0.067497		0.067969	5.62e-16	1.89e-14	0.0001199	3.17e-07	0.842976	0.0010246	0.0250882	7.43e-05	0.0007136	1.85e-05	0.0020448	2.96e-05	0.0021258	1.67e-05	0.820042	0.00097	0.0241603	6.9e-05	0.0007252	1.7e-05	0.0020287	2.9e-05	0.0022762	1.6e-05	1.01477	0.0021223	1.01477	0.0021223	1.01477	0.0021223	1.01477	0.0021223	1.01477	0.0021223	380.8	12	0	0
18909-03B	Orange Tuff	p2	OT 130-p2	Turkana	USGS62B	LLLLLA A	1.89178	0.0550764	0.0553023		0.0561439	3.92e-16	9.02e-15	0.0001199	3.17e-07	0.402691	0.0005758	0.0175041	7.15e-05	0.0003627	1.58e-05	0.0012265	1.8e-05	0.0008445	1.19e-05	0.397841	0.00053	0.016899	6.6e-05	0.0003844	1.4e-05	0.0012223	1.7e-05	0.0009747	1.1e-05	1.01477	0.0021223	1.01477	0.0021223	1.01477	0.0021223	1.01477	0.0021223	1.01477	0.0021223	438.9	21	0	0
18910-01B	Orange Tuff	p3	OT 130-p3	Turkana	USGS62B	LLLLLA A	1.78403	0.021838	0.0223398		0.0225487	1.23e-15	1.75e-14	0.0001199	3.17e-07	0.782771	0.0015144	0.0547544	0.0001028	0.0008669	2.13e-05	0.0003396	1.52e-05	0.0011298	1.18e-05	0.75688	0.0015	0.0525472	9.9e-05	0.0008741	2e-05	0.0003483	1.4e-05	0.0012591	1.1e-05	1.01477	0.0021223	1.01477	0.0021223	1.01477	0.0021223	1.01477	0.0021223	1.01477	0.0021223	615.8	30	0	0
18910-02B	Orange Tuff	p3	OT 130-p3	Turkana	USGS62B	LLLLLA A	1.80234	0.0530812	0.0532939		0.0535123	6.05e-16	1.68e-14	0.0001199	3.17e-07	0.750861	0.0010282	0.0269746	8.65e-05	0.0006994	1.41e-05	0.0001755	1.16e-05	0.0017726	1.38e-05	0.727374	0.001	0.0259603	8.2e-05	0.0007114	1.2e-05	0.0001865	1e-05	0.0019011	1.3e-05	1.01477	0.0021223	1.01477	0.0021223	1.01477	0.0021223	1.01477	0.0021223	1.01477	0.0021223	395.6	12	0	0
18910-03B	Orange Tuff	p3	OT 130-p3	Turkana	USGS62B	LLLLLA A	1.80064	0.0666147	0.066784		0.0665261	3.31e-16	8.94e-15	0.0001199	3.17e-07	0.399117	0.0006215	0.0147649	5.56e-05	0.0003504	1.41e-05	8.74e-05	1.01e-05	0.0009308	1.2e-05	0.397165	0.00057	0.0142726	4.8e-05	0.0003725	1.2e-05	9.98e-05	8.2e-06	0.0010619	1.1e-05	1.01477	0.0021223	1.01477	0.0021223	1.01477	0.0021223	1.01477	0.0021223	1.01477	0.0021223	404.7	19	0	0
18910-04B	Orange Tuff	p3	OT 130-p3	Turkana	USGS62B	LLLLLA A	1.79486	0.040229	0.0405069		0.0405472	3.76e-16	5.66e-15	0.0001199	3.17e-07	0.252476	0.0005143	0.0167933	6.82e-05	0.0002977	1.5e-05	8.79e-05	1.07e-05	0.0003852	9.06e-06	0.259752	0.00046	0.0162122	6.2e-05	0.0003213	1.3e-05	0.0001003	8.9e-06	0.0005198	8e-06	1.01477	0.0021223	1.01477	0.0021223	1.01477	0.0021223	1.01477	0.0021223	1.01477	0.0021223	583.3	52	0	0
18901-01B	FxJj18 Tuff	p1	130-P3	Turkana	USGS62B	LLLLLA A	1.52057	0.0143099	0.014862		0.0148891	1.5e-15	1.49e-14	0.0001199	3.17e-07	0.663687	0.0008428	0.0669162	0.0001133	0.0010186	2.04e-05	6.46e-05	9.78e-06	0.0006684	1.09e-05	0.645555	0.00083	0.064137	0.00011	0.0010214	1.9e-05	7.73e-05	7.8e-06	0.000788	1e-05	1.01477	0.0021223	1.01477	0.0021223	1.01477	0.0021223	1.01477	0.0021223	1.01477	0.0021223	841	73	0	0
18901-02B	FxJj18 Tuff	p1	130-P3	Turkana	USGS62B	LLLLLA A	1.48704	0.0235217	0.0238469		0.0242731	1.16e-15	1.56e-14	0.0001199	3.17e-07	0.698179	0.0006075	0.0516685	0.0001133	0.0009029	1.85e-05	4.38e-05	9.54e-06	0.0011647	1.36e-05	0.679206	0.00059	0.049547	0.00011	0.000909	1.7e-05	5.68e-05	7.5e-06	0.0012872	1.3e-05	1.01477	0.0021223	1.01477	0.0021223	1.01477	0.0021223	1.01477	0.0021223	1.01477	0.0021223	549.5	27	0	0
18901-03B	FxJj18 Tuff	p1	130-P3	Turkana	USGS62B	LLLLLA A	1.53956	0.0216331	0.0220114		0.0221619	1.18e-15	1.53e-14	0.0001199	3.17e-07	0.685161	0.0006906	0.0527287	0.0001133	0.000894	1.67e-05	0.0001154	1.11e-05	0.0010548	1.26e-05	0.668074	0.00067	0.050564	0.00011	0.0009004	1.5e-05	0.0001274	9.4e-06	0.0011802	1.2e-05	1.01477	0.0021223	1.01477	0.0021223	1.01477	0.0021223	1.01477	0.0021223	1.01477	0.0021223	572.8	30	0	0
18901-04A	FxJj18 Tuff	p1	130-P3	Turkana	USGS62B	LLLLL A	1.53063	0.10629	0.106367		0.105572	2.55e-16	1.07e-14	0.0001199	3.17e-07	0.477188	0.000603	0.0113551	5.2e-05	0.000416	1.33e-05	1.86e-06	7.85e-06	0.0013329	1.48e-05	0.466864	0.00057	0.0109148	5.1e-05	0.000426	1.1e-05	1.08e-05	4.4e-06	0.0014471	1.4e-05	1.0148	0.0019384	1.0148	0.0019384	1.0148	0.0019384	1.0148	0.0019384	1.0148	0.0019384	0	0	0	0
18901-05A	FxJj18 Tuff	p1	130-P3	Turkana	USGS62B	LLLLL A	1.50817	0.0176372	0.0180809		0.017997	6.85e-16	5.68e-15	0.0001199	3.17e-07	0.253435	0.0004329	0.0305526	7.96e-05	0.0004167	1.41e-05	1.08e-05	7.29e-06	0.0001445	7.48e-06	0.255727	0.0004	0.0292855	7.9e-05	0.0004267	1.2e-05	1.96e-05	3.3e-06	0.0002583	6.2e-06	1.0148	0.0019384	1.0148	0.0019384	1.0148	0.0019384	1.0148	0.0019384	1.0148	0.0019384	0	0	0	0
18901-06A	FxJj18 Tuff	p1	130-P3	Turkana	USGS62B	LLLLL A	1.48156	0.0245286	0.0248384		0.0253054	5.27e-16	5.42e-15	0.0001199	3.17e-07	0.242015	0.0005231	0.0234952	6.87e-05	0.00037	1.08e-05	7.35e-06	8.78e-06	0.0002785	7.86e-06	0.24482	0.0005	0.0225321	6.8e-05	0.0003814	7.9e-06	1.62e-05	5.9e-06	0.0003919	6.8e-06	1.0148	0.0019384	1.0148	0.0019384	1.0148	0.0019384	1.0148	0.0019384	1.0148	0.0019384	0	0	0	0
18901-12A	FxJj18 Tuff	p1	130-P3	Turkana	USGS62B	LLLLL A	1.48498	0.0285834	0.0288509		0.0293642	3.4e-16	2.68e-15	0.0001199	3.17e-07	0.119706	0.0002662	0.0151602	5.3e-05	0.0002039	1.33e-05	6.53e-06	7.53e-06	5.68e-05	6.35e-06	0.128451	0.00021	0.014556	5.2e-05	0.0002201	1.1e-05	1.54e-05	3.8e-06	0.0001663	5e-06	1.0148	0.0019384	1.0148	0.0019384	1.0148	0.0019384	1.0148	0.0019384	1.0148	0.0019384	0	0	0	0
18901-13A	FxJj18 Tuff	p1	130-P3	Turkana	USGS62B	LLLLL A	1.33687	0.0436954	0.0438377		0.04393	2.16e-16	1.77e-15	0.0001199	3.17e-07	0.0791043	0.0003382	0.0096301	5e-05	0.0001363	1.09e-05	2.38e-05	8.51e-06	6.83e-05	6.17e-06	0.090081	0.00031	0.0092641	4.9e-05	0.0001544	8e-06	3.25e-05	5.5e-06	0.0001768	5.1e-06	1.0148	0.0019384	1.0148	0.0019384	1.0148	0.0019384	1.0148	0.0019384	1.0148	0.0019384	0	0	0	0
18901-15A	FxJj18 Tuff	p1	130-P3	Turkana	USGS62B	LLLLL A	1.55818	0.0543389	0.0544943		0.0542579	3.23e-16	6.58e-15	0.0001199	3.17e-07	0.294041	0.0005446	0.0144147	5.98e-05	0.000333	1.5e-05	1.18e-05	8.85e-06	0.0006417	1.03e-05	0.292601	0.00053	0.0138426	5.9e-05	0.0003454	1.3e-05	2.06e-05	6e-06	0.0007482	9.5e-06	1.0148	0.0019384	1.0148	0.0019384	1.0148	0.0019384	1.0148	0.0019384	1.0148	0.0019384	0	0	0	0
18901-16A	FxJj18 Tuff	p1	130-P3	Turkana	USGS62B	LLLLL A	2.39226	0.0590025	0.0593392		0.0591746	2.53e-16	5.06e-15	0.0001199	3.17e-07	0.226081	0.0005913	0.0112776	4.51e-05	0.0002237	1.33e-05	4.08e-06	8.02e-06	0.0003448	9.2e-06	0.228322	0.00057	0.0108407	4.4e-05	0.0002393	1.1e-05	1.3e-05	4.7e-06	0.0004502	8e-06	1.0148	0.0019384	1.0148	0.0019384	1.0148	0.0019384	1.0148	0.0019384	1.0148	0.0019384	0	0	0	0
18901-17A	FxJj18 Tuff	p1	130-P3	Turkana	USGS62B	LLLLL A	1.48007	0.0279833	0.0282547		0.0285912	3.46e-16	2.48e-15	0.0001199	3.17e-07	0.110724	0.0002509	0.015439	4.61e-05	0.0002072	1.06e-05	5.6e-06	6.96e-06	2.15e-05	6.4e-06	0.119444	0.00021	0.0148228	4.5e-05	0.0002233	7.6e-06	1.45e-05	2.5e-06	0.0001274	5.1e-06	1.0148	0.0019384	1.0148	0.0019384	1.0148	0.0019384	1.0148	0.0019384	1.0148	0.0019384	0	0	0	0
18901-19A	FxJj18 Tuff	p1	130-P3	Turkana	USGS62B	LLLLL A	1.53216	0.0205703	0.020964		0.0211802	5.78e-16	5.04e-15	0.0001199	3.17e-07	0.225183	0.0004485	0.0257999	7.67e-05	0.000392	1.33e-05	7e-07	8.14e-06	0.0001499	7.38e-06	0.22718	0.00042	0.0247375	7.6e-05	0.0004027	1.1e-05	9.66e-06	4.9e-06	0.0002565	6.1e-06	1.0148	0.0019384	1.0148	0.0019384	1.0148	0.0019384	1.0148	0.0019384	1.0148	0.0019384	0	0	0	0
18901-20A	FxJj18 Tuff	p1	130-P3	Turkana	USGS62B	LLLLL A	1.47273	0.0399798	0.0401683		0.0399233	2.38e-16	1.84e-15	0.0001199	3.17e-07	0.0820074	0.0002306	0.0106268	4.32e-05	0.0001434	1.13e-05	1.24e-06	7.79e-06	3.54e-05	6.32e-06	0.092018	0.00017	0.0102179	4.2e-05	0.0001613	8.6e-06	1.02e-05	4.3e-06	0.0001428	4.8e-06	1.0148	0.0019384	1.0148	0.0019384	1.0148	0.0019384	1.0148	0.0019384	1.0148	0.0019384	0	0	0	0
18901-21A	FxJj18 Tuff	p1	130-P3	Turkana	USGS62B	LLLLL A	1.5354	0.0525605	0.0527165		0.0530714	1.97e-16	1.91e-15	0.0001199	3.17e-07	0.0853925	0.0002301	0.0087777	4.22e-05	0.0001304	1.02e-05	3.4e-06	7.74e-06	8e-05	6.86e-06	0.095157	0.00019	0.0084484	4.1e-05	0.0001486	7e-06	1.23e-05	4.2e-06	0.0001878	5.9e-06	1.0148	0.0019384	1.0148	0.0019384	1.0148	0.0019384	1.0148	0.0019384	1.0148	0.0019384	0	0	0	0
18901-22A	FxJj18 Tuff	p1	130-P3	Turkana	USGS62B	LLLLL A	1.5303	0.0154456	0.015965		0.0160827	7.62e-16	6.16e-15	0.0001199	3.17e-07	0.275313	0.0003978	0.0339775	8.46e-05	0.0004849	1.33e-05	-4.06e-08	7.91e-06	0.0001272	7.21e-06	0.274193	0.00038	0.0325629	8.4e-05	0.0004929	1.1e-05	8.93e-06	4.5e-06	0.0002354	6.4e-06	1.0148	0.0019384	1.0148	0.0019384	1.0148	0.0019384	1.0148	0.0019384	1.0148	0.0019384	0	0	0	0
18901-23A	FxJj18 Tuff	p1	130-P3	Turkana	USGS62B	LLLLL A	1.55359	0.0433445	0.043538		0.0442324	2.76e-16	3.23e-15	0.0001199	3.17e-07	0.144338	0.000298	0.0122992	5.1e-05	0.0002058	1.13e-05	-3.04e-07	8.39e-06	0.0001913	7.73e-06	0.150631	0.00027	0.0118183	5e-05	0.0002219	8.5e-06	8.67e-06	5.3e-06	0.0002999	6.8e-06	1.0148	0.0019384	1.0148	0.0019384	1.0148	0.0019384	1.0148	0.0019384	1.0148	0.0019384	0	0	0	0
18901-24A	FxJj18 Tuff	p1	130-P3	Turkana	USGS62B	LLLLL A	1.55385	0.025603	0.0259294		0.0261541	4.96e-16	5.18e-15	0.0001199	3.17e-07	0.231435	0.0005737	0.022148	6.87e-05	0.0003227	1.41e-05	6.35e-06	8.02e-06	0.0002491	7.73e-06	0.232795	0.00056	0.0212429	6.8e-05	0.0003354	1.2e-05	1.52e-05	4.7e-06	0.0003585	6.8e-06	1.0148	0.0019384	1.0148	0.0019384	1.0148	0.0019384	1.0148	0.0019384	1.0148	0.0019384	0	0	0	0
18901-25A	FxJj18 Tuff	p1	130-P3	Turkana	USGS62B	LLLLL A	1.45185	0.101311	0.101383		0.100074	9.56e-17	1.05e-15	0.0001199	3.17e-07	0.0469727	0.0002029	0.0042638	2.97e-05	7.42e-05	1.03e-05	1.62e-06	7.91e-06	6.27e-05	6.5e-06	0.058933	0.00017	0.0041289	2.8e-05	9.41e-05	7.1e-06	1.06e-05	4.5e-06	0.0001726	5.6e-06	1.0148	0.0019384	1.0148	0.0019384	1.0148	0.0019384	1.0148	0.0019384	1.0148	0.0019384	0	0	0	0
18901-26A	FxJj18 Tuff	p1	130-P3	Turkana	USGS62B	LLLLL A	1.49248	0.0338008	0.0340296		0.0335399	2.73e-16	2.03e-15	0.0001199	3.17e-07	0.0906198	0.0003115	0.012171	4.12e-05	0.0001734	1.13e-05	3.58e-06	7.69e-06	2.58e-05	6.07e-06	0.100188	0.00029	0.0116956	4e-05	0.0001905	8.6e-06	1.25e-05	4.1e-06	0.0001363	5e-06	1.0148	0.0019384	1.0148	0.0019384	1.0148	0.0019384	1.0148	0.0019384	1.0148	0.0019384	0	0	0	0
18902-01B	FxJj18 Tuff	p2	130-P4	Turkana	USGS62B	LLLLLA A	1.59181	0.0270002	0.0273252		0.0270814	8.9e-16	1.3e-14	0.0001199	3.17e-07	0.580055	0.0011201	0.0397134	9.6e-05	0.0006969	1.76e-05	4.83e-05	9.94e-06	0.0009771	1.2e-05	0.57022	0.0011	0.0381107	9.2e-05	0.000709	1.6e-05	6.12e-05	8e-06	0.0011058	1.1e-05	1.01477	0.0021223	1.01477	0.0021223	1.01477	0.0021223	1.01477	0.0021223	1.01477	0.0021223	532.1	29	0	0
18902-02B	FxJj18 Tuff	p2	130-P4	Turkana	USGS62B	LLLLLA A	1.54376	0.0511177	0.0512799		0.0521804	9.72e-16	2.76e-14	0.0001199	3.17e-07	1.23388	0.0008579	0.0433629	8.55e-05	0.0011429	2.04e-05	2.81e-05	1.14e-05	0.0031105	1.85e-05	1.18479	0.00083	0.0416155	8.1e-05	0.0011421	1.9e-05	4.13e-05	9.7e-06	0.0032389	1.8e-05	1.01477	0.0021223	1.01477	0.0021223	1.01477	0.0021223	1.01477	0.0021223	1.01477	0.0021223	375.04	8.8	0	0
18902-03B	FxJj18 Tuff	p2	130-P4	Turkana	USGS62B	LLLLLA A	1.57375	0.0179027	0.0183782		0.01826	1.21e-15	1.38e-14	0.0001199	3.17e-07	0.616794	0.0009933	0.0540746	0.0001133	0.0008556	1.85e-05	6.55e-05	9.54e-06	0.0007658	1.07e-05	0.603909	0.00097	0.051869	0.00011	0.0008631	1.7e-05	7.82e-05	7.5e-06	0.0008986	1e-05	1.01477	0.0021223	1.01477	0.0021223	1.01477	0.0021223	1.01477	0.0021223	1.01477	0.0021223	680.6	54	0	0
18902-04A	FxJj18 Tuff	p2	130-P4	Turkana	USGS62B	LLLLL A	1.52886	0.0642459	0.0643725		0.0658282	5.47e-16	1.83e-14	0.0001199	3.17e-07	0.815442	0.0013056	0.024416	6.68e-05	0.0007019	1.67e-05	-5.93e-06	7.79e-06	0.0021609	1.55e-05	0.78155	0.0013	0.0234132	6.6e-05	0.0007037	1.5e-05	3.13e-06	4.3e-06	0.0022597	1.5e-05	1.0148	0.0019384	1.0148	0.0019384	1.0148	0.0019384	1.0148	0.0019384	1.0148	0.0019384	0	0	0	0
18902-05A	FxJj18 Tuff	p2	130-P4	Turkana	USGS62B	LLLLL A	1.4571	0.0419367	0.0421127		0.0422538	2.64e-16	3.01e-15	0.0001199	3.17e-07	0.134618	0.0002911	0.0117616	4.32e-05	0.00019	1.21e-05	1.23e-05	7.24e-06	0.000189	7.14e-06	0.139533	0.00027	0.0113038	4.2e-05	0.0002066	9.6e-06	2.11e-05	3.2e-06	0.000287	6.1e-06	1.0148	0.0019384	1.0148	0.0019384	1.0148	0.0019384	1.0148	0.0019384	1.0148	0.0019384	0	0	0	0
18902-06A	FxJj18 Tuff	p2	130-P4	Turkana	USGS62B	LLLLL A	1.4193	0.0438164	0.0439763		0.0440839	2.61e-16	3.62e-15	0.0001199	3.17e-07	0.161716	0.0002611	0.0116266	4.81e-05	0.000201	1.08e-05	-2.44e-07	8.32e-06	0.0002894	7.17e-06	0.165085	0.00024	0.0111746	4.7e-05	0.0002173	7.9e-06	8.73e-06	5.2e-06	0.0003867	6.2e-06	1.0148	0.0019384	1.0148	0.0019384	1.0148	0.0019384	1.0148	0.0019384	1.0148	0.0019384	0	0	0	0
18902-07A	FxJj18 Tuff	p2	130-P4	Turkana	USGS62B	LLLLL A	1.60633	0.0491269	0.0493095		0.0503263	3.12e-16	5.83e-15	0.0001199	3.17e-07	0.26055	0.0005794	0.0139225	5.1e-05	0.0002934	1.19e-05	5.51e-06	7.96e-06	0.0005309	9.02e-06	0.258284	0.00057	0.0133716	5e-05	0.000307	9.3e-06	1.44e-05	4.6e-06	0.0006274	8.2e-06	1.0148	0.0019384	1.0148	0.0019384	1.0148	0.0019384	1.0148	0.0019384	1.0148	0.0019384	0	0	0	0
18902-08A	FxJj18 Tuff	p2	130-P4	Turkana	USGS62B	LLLLL A	1.53754	0.044446	0.0446309		0.0456495	3.72e-16	6.59e-15	0.0001199	3.17e-07	0.294442	0.0004768	0.0165726	6.48e-05	0.0003288	1.24e-05	1.76e-06	7.96e-06	0.0005968	9.66e-06	0.290276	0.00046	0.0159076	6.4e-05	0.0003414	1e-05	1.07e-05	4.6e-06	0.0006904	8.5e-06	1.0148	0.0019384	1.0148	0.0019384	1.0148	0.0019384	1.0148	0.0019384	1.0148	0.0019384	0	0	0	0
18902-09A	FxJj18 Tuff	p2	130-P4	Turkana	USGS62B	LLLLL A	1.53037	0.0382184	0.0384313		0.038386	2.97e-16	3.25e-15	0.0001199	3.17e-07	0.145316	0.0002835	0.0132706	5.89e-05	0.0002232	1.1e-05	4.77e-06	7.12e-06	0.0001763	7.3e-06	0.149687	0.00026	0.0127478	5.8e-05	0.0002388	8.2e-06	1.37e-05	2.9e-06	0.0002695	6.2e-06	1.0148	0.0019384	1.0148	0.0019384	1.0148	0.0019384	1.0148	0.0019384	1.0148	0.0019384	0	0	0	0
18902-10A	FxJj18 Tuff	p2	130-P4	Turkana	USGS62B	LLLLL A	1.43294	0.0472006	0.0473519		0.0477999	2.21e-16	2.28e-15	0.0001199	3.17e-07	0.101754	0.0003036	0.0098659	5.2e-05	0.0001479	1.03e-05	-4.37e-06	7.74e-06	0.0001247	6.8e-06	0.108646	0.00028	0.0094898	5.1e-05	0.0001656	7.1e-06	4.66e-06	4.2e-06	0.0002175	5.8e-06	1.0148	0.0019384	1.0148	0.0019384	1.0148	0.0019384	1.0148	0.0019384	1.0148	0.0019384	0	0	0	0
18902-11A	FxJj18 Tuff	p2	130-P4	Turkana	USGS62B	LLLLL A	1.54655	0.0418258	0.0420245		0.0419354	3.07e-16	3.8e-15	0.0001199	3.17e-07	0.169582	0.0003038	0.0137048	4.9e-05	0.0002409	1.5e-05	-4.67e-07	7.53e-06	0.000244	8.25e-06	0.172648	0.00027	0.0131633	4.8e-05	0.000256	1.3e-05	8.51e-06	3.8e-06	0.0003364	7.3e-06	1.0148	0.0019384	1.0148	0.0019384	1.0148	0.0019384	1.0148	0.0019384	1.0148	0.0019384	0	0	0	0
18902-12A	FxJj18 Tuff	p2	130-P4	Turkana	USGS62B	LLLLL A	1.49414	0.0399322	0.0401265		0.0398269	3.21e-16	3.94e-15	0.0001199	3.17e-07	0.175906	0.0002872	0.0143069	5.89e-05	0.0002144	1.09e-05	3.03e-06	7.85e-06	0.0002624	8.15e-06	0.178552	0.00025	0.0137395	5.8e-05	0.0002302	8e-06	1.2e-05	4.4e-06	0.0003539	7.2e-06	1.0148	0.0019384	1.0148	0.0019384	1.0148	0.0019384	1.0148	0.0019384	1.0148	0.0019384	0	0	0	0
18902-14A	FxJj18 Tuff	p2	130-P4	Turkana	USGS62B	LLLLL A	1.49625	0.0326421	0.0328801		0.0331413	4.51e-16	5.84e-15	0.0001199	3.17e-07	0.260981	0.0005547	0.0201106	6.08e-05	0.0003461	1.33e-05	1.18e-06	7.58e-06	0.0004142	8.86e-06	0.258579	0.00054	0.0192932	6e-05	0.0003582	1.1e-05	1.01e-05	3.9e-06	0.0005045	8.2e-06	1.0148	0.0019384	1.0148	0.0019384	1.0148	0.0019384	1.0148	0.0019384	1.0148	0.0019384	0	0	0	0
18902-15A	FxJj18 Tuff	p2	130-P4	Turkana	USGS62B	LLLLL A	1.52614	0.108434	0.108509		0.109689	4.03e-16	2.34e-14	0.0001199	3.17e-07	1.04458	0.0014078	0.0179957	6.87e-05	0.0008064	2.13e-05	5.92e-06	8.2e-06	0.0030795	1.65e-05	0.9974	0.0014	0.0172694	6.8e-05	0.0008052	2e-05	1.48e-05	5e-06	0.0031692	1.6e-05	1.0148	0.0019384	1.0148	0.0019384	1.0148	0.0019384	1.0148	0.0019384	1.0148	0.0019384	0	0	0	0
18902-17A	FxJj18 Tuff	p2	130-P4	Turkana	USGS62B	LLLLL A	1.37113	0.0762282	0.0763141		0.0773915	1.64e-16	3.56e-15	0.0001199	3.17e-07	0.159069	0.000244	0.0073271	3.93e-05	0.0001725	1.06e-05	1.08e-05	8.02e-06	0.0003793	7.83e-06	0.16221	0.00021	0.0070603	3.8e-05	0.0001895	7.6e-06	1.96e-05	4.7e-06	0.0004675	7.1e-06	1.0148	0.0019384	1.0148	0.0019384	1.0148	0.0019384	1.0148	0.0019384	1.0148	0.0019384	0	0	0	0
18902-18A	FxJj18 Tuff	p2	130-P4	Turkana	USGS62B	LLLLL A	1.52018	0.0281228	0.0284076		0.028565	6.09e-16	8.39e-15	0.0001199	3.17e-07	0.374894	0.0004936	0.027154	7.27e-05	0.0004581	1.18e-05	6.65e-06	8.14e-06	0.0006247	9.72e-06	0.365704	0.00048	0.0260333	7.2e-05	0.0004669	9.2e-06	1.55e-05	4.9e-06	0.0007124	9.2e-06	1.0148	0.0019384	1.0148	0.0019384	1.0148	0.0019384	1.0148	0.0019384	1.0148	0.0019384	0	0	0	0
18902-19A	FxJj18 Tuff	p2	130-P4	Turkana	USGS62B	LLLLL A	1.50601	0.0231374	0.0234764		0.0235874	4.25e-16	3.14e-15	0.0001199	3.17e-07	0.140138	0.0002709	0.0189751	6.77e-05	0.0002484	1.21e-05	-3.32e-06	7.85e-06	3.25e-05	6.35e-06	0.144298	0.00024	0.0182066	6.7e-05	0.0002632	9.6e-06	5.7e-06	4.4e-06	0.0001195	5.3e-06	1.0148	0.0019384	1.0148	0.0019384	1.0148	0.0019384	1.0148	0.0019384	1.0148	0.0019384	0	0	0	0
18902-20A	FxJj18 Tuff	p2	130-P4	Turkana	USGS62B	LLLLL A	1.48133	0.0322518	0.0324879		0.032464	3.21e-16	2.86e-15	0.0001199	3.17e-07	0.12792	0.0002453	0.01431	5.39e-05	0.0002274	1.1e-05	5.65e-06	7.63e-06	0.0001044	6.74e-06	0.131922	0.00019	0.0137425	5.3e-05	0.0002428	8.1e-06	1.45e-05	4e-06	0.0001905	5.5e-06	1.0148	0.0019384	1.0148	0.0019384	1.0148	0.0019384	1.0148	0.0019384	1.0148	0.0019384	0	0	0	0
18912-05A	Bishop Tuff sanidine		BT	monitor	USGS62B	LLLLLA A	0.780091	0.0422264	0.0422765		0.0425903	4.82e-16	9.55e-15	0.0001199	3.17e-07	0.426457	0.0007718	0.0215142	6.66e-05	0.0005475	1.38e-05	9.94e-05	1.18e-05	0.0011723	1.26e-05	0.417389	0.00076	0.0206174	6.6e-05	0.0005609	1.3e-05	0.0001091	8e-06	0.0013225	1.2e-05	1.0159	0.0010189	1.0159	0.0010189	1.0159	0.0010189	1.0159	0.0010189	1.0159	0.0010189	341.7	14	0	0
18912-09A	Bishop Tuff sanidine		BT	monitor	USGS62B	LLLLLA A	0.741839	0.019913	0.0200091		0.0201219	9.45e-16	9.68e-15	0.0001199	3.17e-07	0.432517	0.0005565	0.0422273	9.24e-05	0.0007401	1.39e-05	0.0001658	1.22e-05	0.0009705	1.19e-05	0.422875	0.00054	0.0403628	9.2e-05	0.0007466	1.3e-05	0.0001745	8.6e-06	0.0011148	1.1e-05	1.0159	0.0010189	1.0159	0.0010189	1.0159	0.0010189	1.0159	0.0010189	1.0159	0.0010189	416.7	19	0	0
18912-11A	Bishop Tuff sanidine		BT	monitor	USGS62B	LLLLLA A	0.745563	0.0131774	0.0133236		0.0132725	8.7e-16	3.58e-15	0.0001199	3.17e-07	0.159904	0.0002956	0.0388456	7.25e-05	0.0005364	1.56e-05	0.0001537	1.4e-05	9.33e-05	7.66e-06	0.172391	0.00027	0.037137	7.2e-05	0.0005567	1.5e-05	0.0001626	1.1e-05	0.0002615	6.4e-06	1.0159	0.0010189	1.0159	0.0010189	1.0159	0.0010189	1.0159	0.0010189	1.0159	0.0010189	918	210	0	0
18912-12A	Bishop Tuff sanidine		BT	monitor	USGS62B	LLLLLA A	0.760517	0.0165988	0.0167198		0.0166451	6.78e-16	2.15e-15	0.0001199	3.17e-07	0.096196	0.0002652	0.0302686	8.06e-05	0.0004411	1.29e-05	0.0001252	1.11e-05	-2.94e-05	7.55e-06	0.115317	0.00023	0.0289569	8e-05	0.0004687	1.2e-05	0.0001346	6.9e-06	0.0001507	5.8e-06	1.0159	0.0010189	1.0159	0.0010189	1.0159	0.0010189	1.0159	0.0010189	1.0159	0.0010189	2190	4200	0	0
18904-05A	Bishop Tuff sanidine		BT	monitor	USGS62B	LLLLL A	0.727301	0.016081	0.0161952		0.0160376	6.25e-16	2.67e-15	0.0001199	3.17e-07	0.119291	0.0002533	0.027879	7.56e-05	0.0003723	1.19e-05	1.26e-06	8.51e-06	8.96e-05	6.56e-06	0.125613	0.00023	0.0266559	7.5e-05	0.0003829	1.1e-05	7.67e-06	4.2e-06	0.0001859	5.4e-06	1.0156	0.0023442	1.0156	0.0023442	1.0156	0.0023442	1.0156	0.0023442	1.0156	0.0023442	0	0	0	0
18904-04A	Bishop Tuff sanidine		BT	monitor	USGS62B	LLLLL A	0.748948	0.0194414	0.0195417		0.0197775	5.10412e-16	2.40036e-15	0.0001199	3.166e-07	0.107143	0.0002337	0.0227575	6.56e-05	0.0003276	8.14191e-06	1.29e-05	8.4119e-06	9.84e-05	6.49322e-06	0.114364	0.00021	0.0217665	6.5e-05	0.0003402	7.1e-06	1.92e-05	4e-06	0.0001952	5.4e-06	1.0156	0.0023442	1.0156	0.0023442	1.0156	0.0023442	1.0156	0.0023442	1.0156	0.0023442	0	0	0	0
18904-06A	Bishop Tuff sanidine		BT	monitor	USGS62B	LLLLL A	0.751731	0.0252044	0.0252824		0.0255376	3.52527e-16	1.30802e-15	0.0001199	3.166e-07	0.0583776	0.0002476	0.0157159	5.57e-05	0.0001873	1.06e-05	9.16061e-06	8.18596e-06	1.5e-05	5.92757e-06	0.067932	0.00022	0.0150441	5.5e-05	0.0002015	9.3e-06	1.54e-05	3.5e-06	0.0001104	4.4e-06	1.0156	0.0023442	1.0156	0.0023442	1.0156	0.0023442	1.0156	0.0023442	1.0156	0.0023442	0	0	0	0
18904-09A	Bishop Tuff sanidine		BT	monitor	USGS62B	LLLLL A	0.753473	0.0107851	0.010967		0.0110763	1.23e-15	5.81e-15	0.0001199	3.17e-07	0.259217	0.0005311	0.0547427	0.0001203	0.0007717	1.65e-05	9.16e-06	8.71e-06	0.0002377	7.9e-06	0.256504	0.00052	0.052302	0.00012	0.0007657	1.6e-05	1.54e-05	4.6e-06	0.0003327	7e-06	1.0156	0.0023442	1.0156	0.0023442	1.0156	0.0023442	1.0156	0.0023442	1.0156	0.0023442	0	0	0	0
18912-01A	Alder Creek sanidine		AC	monitor	USGS62B	LLLLLA A	1.1775	0.0068678	0.0075384		0.0076105	2.07e-15	1.23e-14	0.0001199	3.17e-07	0.547967	0.0006802	0.0923451	0.0001203	0.0011935	2.06e-05	0.000472	1.48e-05	0.0001747	8.79e-06	0.53218	0.00066	0.088171	0.00012	0.0011899	2e-05	0.0004759	1.2e-05	0.0003312	7.5e-06	1.0159	0.0010189	1.0159	0.0010189	1.0159	0.0010189	1.0159	0.0010189	1.0159	0.0010189	1829	360	0	0
18912-02A	Alder Creek sanidine		AC	monitor	USGS62B	LLLLLA A	1.19411	0.0086574	0.0092134		0.0090905	1.44e-15	8.34e-15	0.0001199	3.17e-07	0.372612	0.0005794	0.0645191	0.0001203	0.0008238	1.85e-05	0.0003523	1.48e-05	7.14e-05	7.82e-06	0.367384	0.00056	0.061634	0.00012	0.0008297	1.8e-05	0.0003581	1.2e-05	0.0002282	6.7e-06	1.0159	0.0010189	1.0159	0.0010189	1.0159	0.0010189	1.0159	0.0010189	1.0159	0.0010189	2021	610	0	0
18912-03A	Alder Creek sanidine		AC	monitor	USGS62B	LLLLLA A	1.18264	0.0096441	0.0101368		0.0101017	1.73e-15	1.21e-14	0.0001199	3.17e-07	0.538911	0.0006323	0.0774016	0.0001104	0.0010772	1.96e-05	0.0004422	1.48e-05	0.0004071	1.06e-05	0.523377	0.00061	0.073926	0.00011	0.0010733	1.9e-05	0.0004466	1.2e-05	0.0005643	9.6e-06	1.0159	0.0010189	1.0159	0.0010189	1.0159	0.0010189	1.0159	0.0010189	1.0159	0.0010189	1031	100	0	0
18912-04A	Alder Creek sanidine		AC	monitor	USGS62B	LLLLLA A	1.17738	0.0096351	0.010124		0.0101404	1.43e-15	8.62e-15	0.0001199	3.17e-07	0.385468	0.0004324	0.0638043	0.0001104	0.0008202	1.87e-05	0.0003651	1.4e-05	0.0001438	8.86e-06	0.379034	0.0004	0.060958	0.00011	0.0008237	1.8e-05	0.0003707	1.1e-05	0.0002979	7.7e-06	1.0159	0.0010189	1.0159	0.0010189	1.0159	0.0010189	1.0159	0.0010189	1.0159	0.0010189	1601	400	0	0
18912-06A	Alder Creek sanidine		AC	monitor	USGS62B	LLLLLA A	1.17994	0.0073807	0.008011		0.0080039	2.14e-15	1.27e-14	0.0001199	3.17e-07	0.566816	0.0008711	0.0956201	0.0001504	0.0012892	2.37e-05	0.0006026	2e-05	0.0001755	9.62e-06	0.549055	0.00086	0.091299	0.00015	0.001281	2.3e-05	0.0006045	1.8e-05	0.0003221	8.5e-06	1.0159	0.0010189	1.0159	0.0010189	1.0159	0.0010189	1.0159	0.0010189	1.0159	0.0010189	1901	410	0	0
18912-07A	Alder Creek sanidine		AC	monitor	USGS62B	LLLLLA A	1.16833	0.0068254	0.0074898		0.0075468	1.79e-15	9.98e-15	0.0001199	3.17e-07	0.445672	0.0004891	0.0800334	0.0001006	0.0010343	1.88e-05	0.0004378	1.82e-05	6.47e-05	7.76e-06	0.435202	0.00047	0.0764273	0.0001	0.0010341	1.8e-05	0.0004423	1.6e-05	0.0002082	6.3e-06	1.0159	0.0010189	1.0159	0.0010189	1.0159	0.0010189	1.0159	0.0010189	1.0159	0.0010189	2750	1300	0	0
18912-08A	Alder Creek sanidine		AC	monitor	USGS62B	LLLLLA A	1.17142	0.0074617	0.0080771		0.0080685	1.69e-15	9.93e-15	0.0001199	3.17e-07	0.443862	0.0005825	0.075421	0.0001203	0.0010194	1.86e-05	0.0004347	1.56e-05	0.0001374	7.8e-06	0.433514	0.00057	0.072026	0.00012	0.0010185	1.8e-05	0.0004392	1.3e-05	0.0002813	6.7e-06	1.0159	0.0010189	1.0159	0.0010189	1.0159	0.0010189	1.0159	0.0010189	1.0159	0.0010189	1755	430	0	0
18912-10A	Alder Creek sanidine		AC	monitor	USGS62B	LLLLLA A	1.18484	0.0081656	0.0087441		0.0085319	1.56e-15	8.6e-15	0.0001199	3.17e-07	0.384433	0.0004987	0.0698646	0.0001104	0.0009506	1.77e-05	0.0003379	1.73e-05	2.34e-05	8.16e-06	0.380475	0.00048	0.066723	0.00011	0.0009537	1.7e-05	0.0003439	1.5e-05	0.0001799	6.8e-06	1.0159	0.0010189	1.0159	0.0010189	1.0159	0.0010189	1.0159	0.0010189	1.0159	0.0010189	3150	2100	0	0
18904-01B	Alder Creek sanidine		AC	monitor	USGS62B	LLLLLA A	1.1808	0.0091291	0.0096465		0.0097089	1.78e-15	1.1e-14	0.0001199	3.17e-07	0.490529	0.0006587	0.0795719	0.0001426	0.0010828	1.85e-05	0.0001647	1.16e-05	0.0002076	9.39e-06	0.481299	0.00064	0.076283	0.00014	0.0010838	1.7e-05	0.0001759	1e-05	0.0003344	8.3e-06	1.01477	0.0021223	1.01477	0.0021223	1.01477	0.0021223	1.01477	0.0021223	1.01477	0.0021223	1507	290	0	0
18904-02B	Alder Creek sanidine		AC	monitor	USGS62B	LLLLLA A	1.20219	0.0116129	0.0120387		0.0119123	1.14e-15	6.7e-15	0.0001199	3.17e-07	0.298945	0.0004141	0.0507776	0.0001231	0.0006487	1.76e-05	0.0001226	1.12e-05	6.87e-05	8.19e-06	0.301323	0.00038	0.04873	0.00012	0.0006622	1.6e-05	0.0001344	9.5e-06	0.0001991	6.8e-06	1.01477	0.0021223	1.01477	0.0021223	1.01477	0.0021223	1.01477	0.0021223	1.01477	0.0021223	1862	660	0	0
18904-03B	Alder Creek sanidine		AC	monitor	USGS62B	LLLLLA A	1.18686	0.0090774	0.0096028		0.0094444	1.59e-15	9.58e-15	0.0001199	3.17e-07	0.427643	0.0005374	0.0709154	0.0001525	0.0009504	1.95e-05	0.0001609	1.14e-05	0.0001465	8.34e-06	0.423582	0.00051	0.068004	0.00015	0.0009552	1.8e-05	0.0001722	9.8e-06	0.0002794	7.3e-06	1.01477	0.0021223	1.01477	0.0021223	1.01477	0.0021223	1.01477	0.0021223	1.01477	0.0021223	1782	450	0	0
18904-07A	Alder Creek sanidine		AC	monitor	USGS62B	LLLLL A	1.19464	0.0114908	0.0119157		0.0120984	9.55e-16	5.37e-15	0.0001199	3.17e-07	0.23972	0.0005391	0.0425677	8.85e-05	0.0005445	1.27e-05	2.24e-05	8.77e-06	2.56e-05	6.73e-06	0.238326	0.00053	0.0406788	8.8e-05	0.000547	1.2e-05	2.85e-05	4.7e-06	0.0001209	5.8e-06	1.0156	0.0023442	1.0156	0.0023442	1.0156	0.0023442	1.0156	0.0023442	1.0156	0.0023442	0	0	0	0
18904-08A	Alder Creek sanidine		AC	monitor	USGS62B	LLLLL A	1.17649	0.008892	0.0094187		0.0095574	1.18e-15	6.7e-15	0.0001199	3.17e-07	0.298935	0.0005485	0.0525825	9.44e-05	0.0006989	1.45e-05	2.03e-05	1.01e-05	5.56e-05	6.07e-06	0.293914	0.00054	0.0502397	9.4e-05	0.0006959	1.4e-05	2.64e-05	6.9e-06	0.0001508	5.1e-06	1.0156	0.0023442	1.0156	0.0023442	1.0156	0.0023442	1.0156	0.0023442	1.0156	0.0023442	0	0	0	0
18904-10A	Alder Creek sanidine		AC	monitor	USGS62B	LLLLL A	1.19515	0.0095197	0.0100289		0.0100593	9.79e-16	5.36e-15	0.0001199	3.17e-07	0.239426	0.000471	0.0436615	9.15e-05	0.0005457	1.26e-05	1.61e-05	8.41e-06	4.24e-06	5.57e-06	0.237911	0.00045	0.0417231	9.1e-05	0.0005468	1.2e-05	2.23e-05	4e-06	9.69e-05	4.5e-06	1.0156	0.0023442	1.0156	0.0023442	1.0156	0.0023442	1.0156	0.0023442	1.0156	0.0023442	0	0	0	0
18904-11A	Alder Creek sanidine		AC	monitor	USGS62B	LLLLL A	1.20173	0.0080505	0.008653		0.0086437	1.5e-15	8.87e-15	0.0001199	3.17e-07	0.395848	0.0007094	0.0668327	0.0001104	0.0008607	1.64e-05	3.62e-05	8.66e-06	9.82e-05	6.54e-06	0.384745	0.0007	0.063844	0.00011	0.0008526	1.6e-05	4.2e-05	4.5e-06	0.0001924	5.8e-06	1.0156	0.0023442	1.0156	0.0023442	1.0156	0.0023442	1.0156	0.0023442	1.0156	0.0023442	0	0	0	0
--- Atmospheric argon ratios and discrimination ---
(40Ar/36Ar)atm	298.5 ± 0.31
(40Ar/38Ar)atm	1575 ± 2
--- Minor irradiation parameters (see also Irradiation Data File) ---
(38Ar/37Ar)Ca	0.0000196 ± 8.160000e-7
(38Ar/39Ar)K	0.0122 ± 0.000027
P(36Cl/38Cl)	320 ± 0
--- Decay constants ---
Lambda 40K epsilon	5.800000e-11 ± 1.400000e-12
Lambda 40K Beta	4.884000e-10 ± 9.900000e-12
Lambda 37Ar	0.01975 ± 0
Lambda 39Ar	7.068000e-6 ± 0
Lambda 36Cl	6.308000e-9 ± 0
[truncated: 46 more columns]
